# Supplementary material
Source: MDPI journal article supplement (https://www.mdpi.com/2227-9717/12/4/832)
Supplement: s1 [file s1]

# Raman technology for process control: waste shells demineralization to produce transparent polymer foils reinforced with natural antioxidant, and calcium acetate by-product

Simona Cînta Pînzaru <sup>1,2 \*</sup>, Iuliana-Cornelia Poplăcean <sup>2 †</sup>, Karlo Maškarić <sup>1,2 †</sup>, Dănuț-Dumitru Alexandru <sup>1</sup>, Lucian Barbu-Tudoran <sup>3,4</sup>, Tudor Tămaș <sup>4</sup>, Fran Nekvapil <sup>1,2,3</sup>, Neculai Bogdan <sup>6</sup>

<sup>1</sup> Babeș-Bolyai University, Biomolecular Physics Department, Kogălniceanu 1, 400084, Cluj-Napoca, Romania; simona.pinzaru@ubbcluj.ro

<sup>2</sup> Institute for Research, Development and Innovation in Applied Natural Sciences, Babeș-Bolyai University, Fântânele 30, Cluj-Napoca, Romania; lucian.baia@phys.ubbcluj.ro

<sup>3</sup> National Institute for Research and Development of Isotopic and Molecular Technologies, Donath 67-103, 400293 Cluj-Napoca, Romania; itim@itim-cj.ro

<sup>4</sup> Electron Microscopy Center, Babeș-Bolyai University, Clinicilor 5-7, 400006 Cluj-Napoca, Romania; e-mail: lucianbarbu@yahoo.com

<sup>5</sup> Department of Geology, Babeș-Bolyai University, M. Kogălniceanu 1, 400084 Cluj-Napoca, Romania; tudor.tamas@ubbcluj.ro

<sup>6</sup> Metrohm Analytics Romania SRL, E. Racoviță 5, 041753 Bucharest, Romania; bogdan.neculai@metrohm.ro

\* Correspondence: simona.pinzaru@ubbcluj.ro; iuliana.poplancean@stud.ubbcluj.ro, karlo.maskaric@ubbcluj.ro

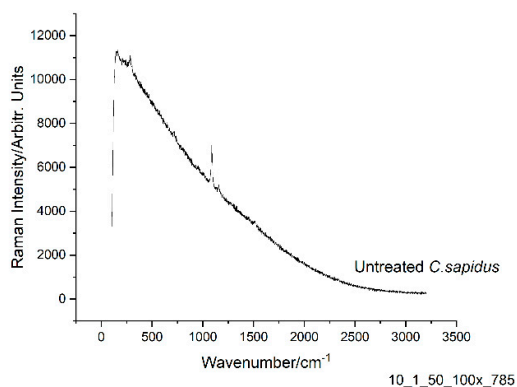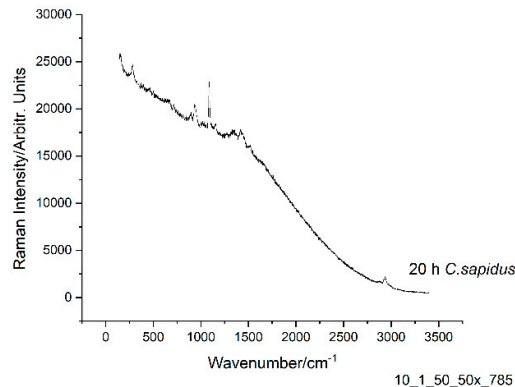

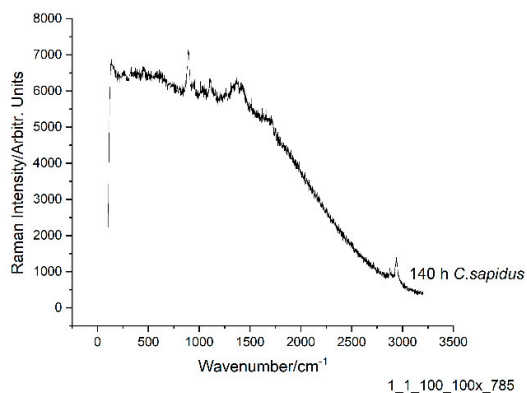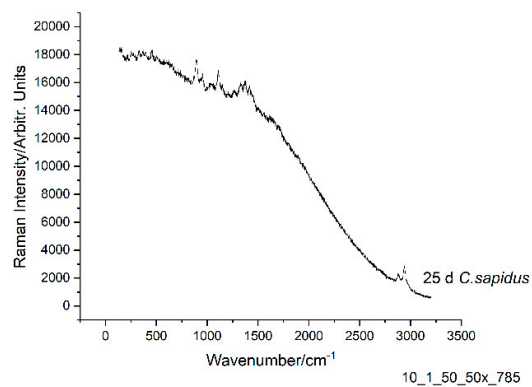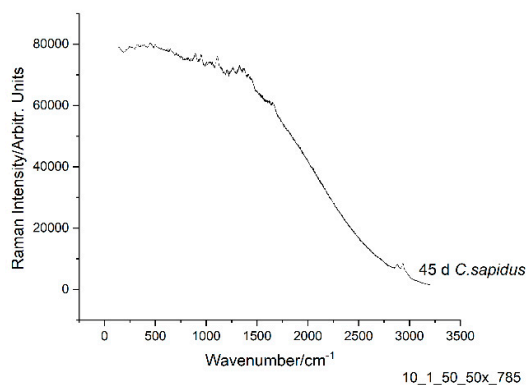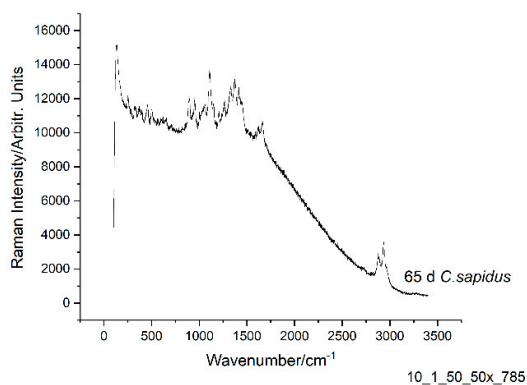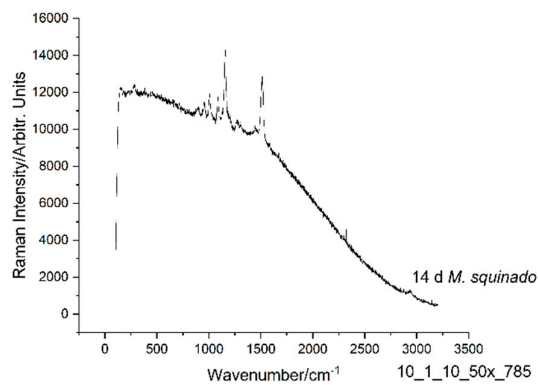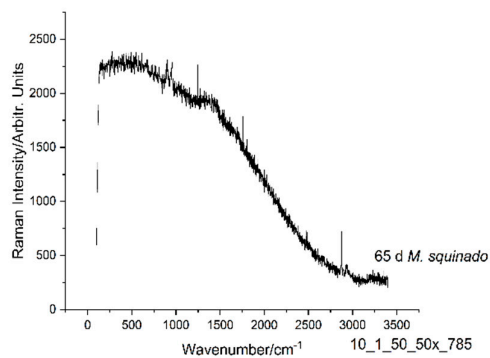

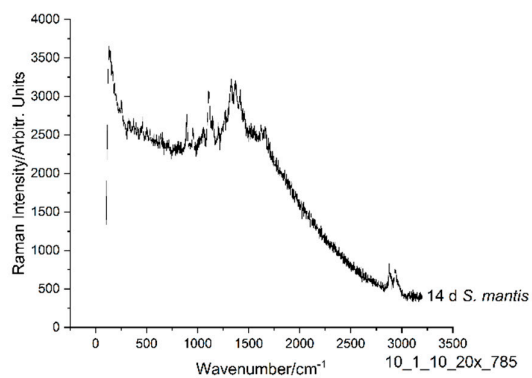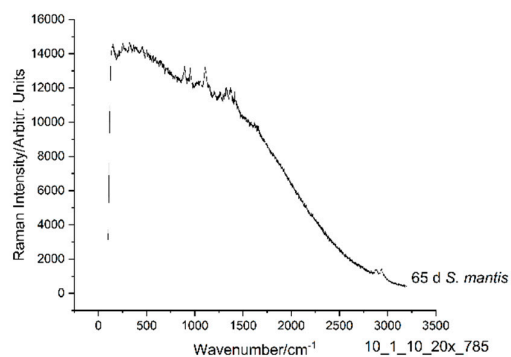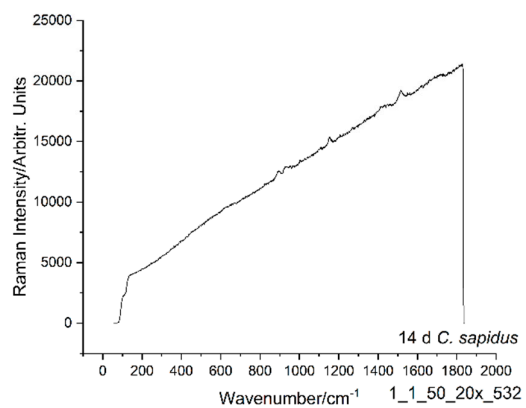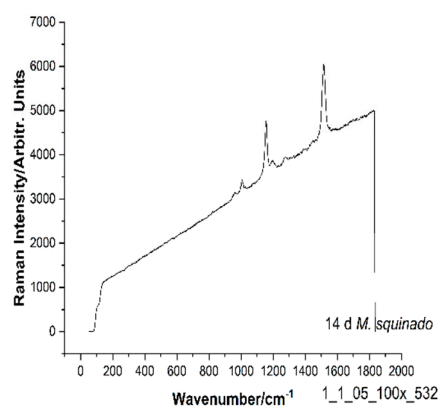

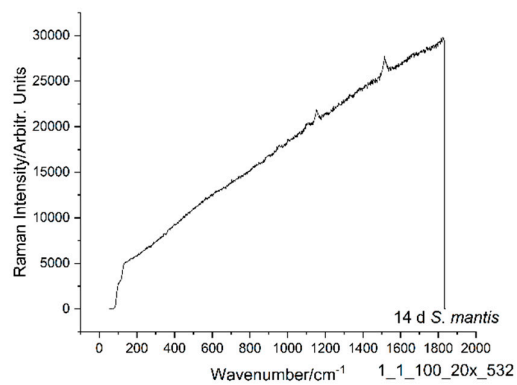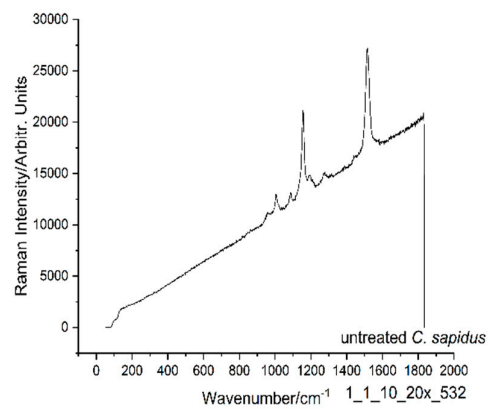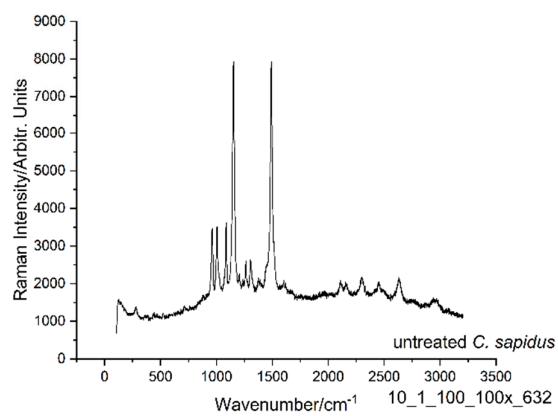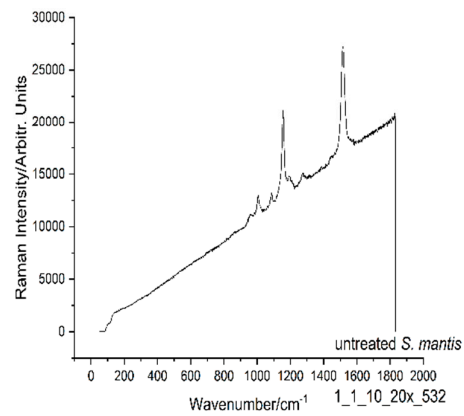

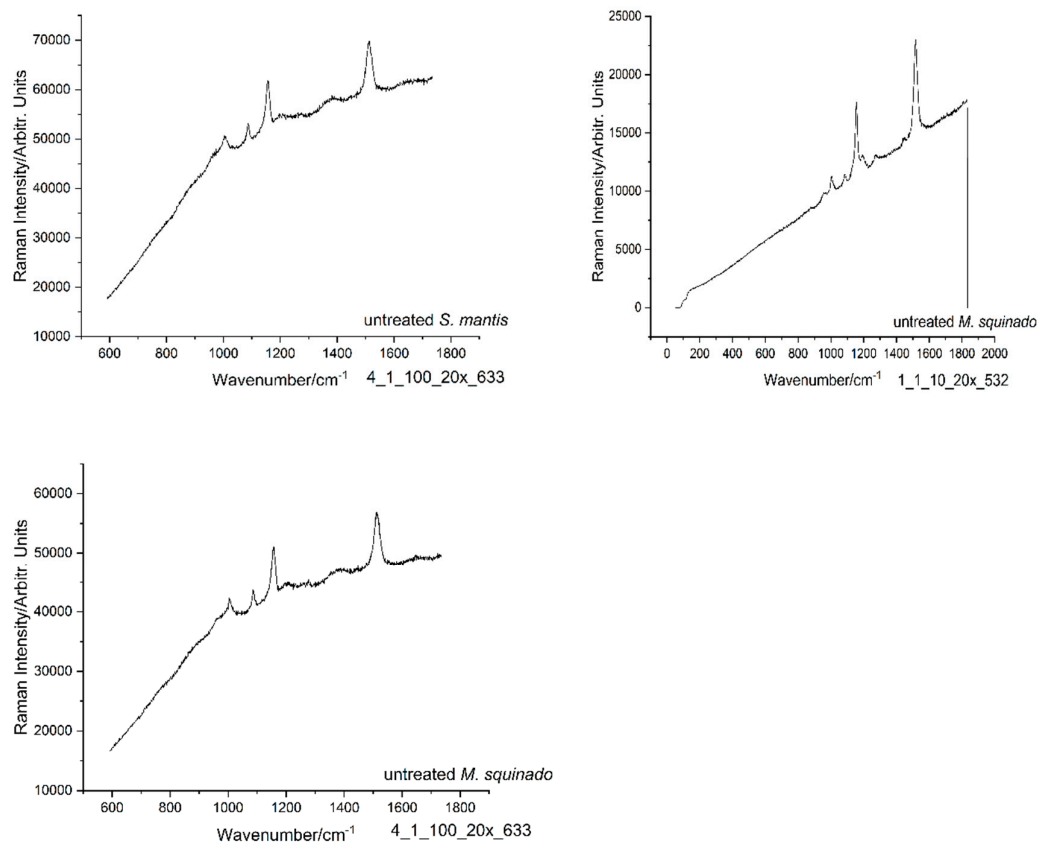

**Figure S1.** A series of 19 typical raw Raman spectra (without any processing), acquired during process of demineralization from crustacean species (as indicated on each spectrum, with specified spectral acquisition parameters in this manner: “time\_nr-acq\_power\_XObj\_laser”, meaning time of exposure, number of acquisitions, laser power %, \_objective magnification, \_laser line /nm, respectively).

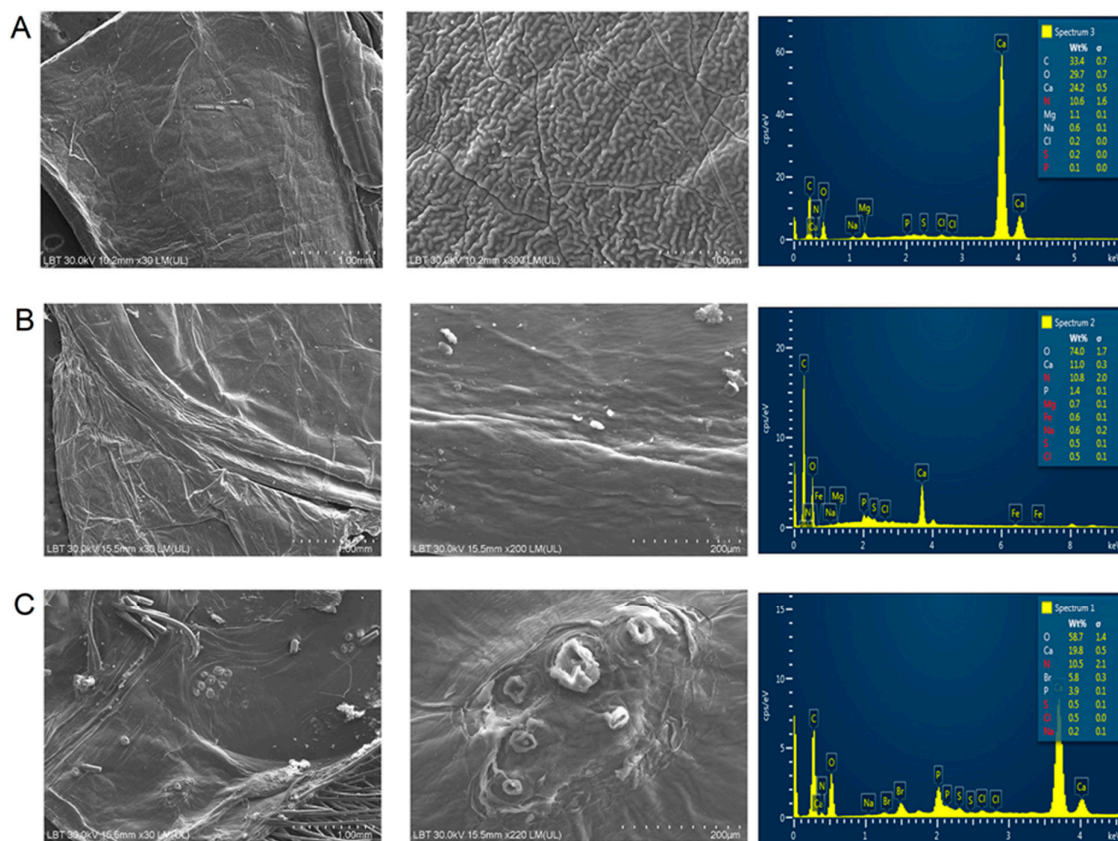

**Figure S2.** SEM images of the surface morphology of the acetic acid bath treated cuticle of three species with corresponding EDX graphs; *C. sapidus* (A), *S. mantis* (B) and *M. squinado* (C).
